# Supplementary material
Source: PubMed Central journal article supplement (PMC5881072)
Supplement: AEM.00044-18_zam008188446s1.pdf [file AEM.00044-18_zam008188446s1.pdf]

1 Supplementary Tables

2

3 Table S.1. Bacteria recovered from hand dryer air at different distances\*

4

5

6 Average numbers of colonies recovered +/- SD

7 2 in from hand dryer 12 in from hand dryer

8 145.8 ± 65.7 80.0 ± 70.3

9 \*4 plates were exposed in one bathroom for 1 min for each distance. Differences did not

10 reach statistical significance.

11

12 Table S.2. Km<sup>r</sup> sporeformers deposited on plates by hand dryer air in bathrooms on  
 13 different floors and in different buildings\*

| 14 | Building:      | 2                                                               | 1    | A                |
|----|----------------|-----------------------------------------------------------------|------|------------------|
| 15 | Floor          | Km <sup>r</sup> sporeformers - % of total colonies <sup>1</sup> |      |                  |
| 16 | 1              | 5.0                                                             | 2.8  | N.A <sup>2</sup> |
| 17 | 2 <sup>3</sup> | 5.0                                                             | 3.6  | N.A <sup>2</sup> |
| 18 | 3              | 0.9                                                             | 6.2  | N.A <sup>2</sup> |
| 19 | 4              | 2.6                                                             | 3.3  | 3.5              |
| 20 | 5              | 6.9                                                             | 6.8  | 2.5              |
| 21 | 6              | 5.8                                                             | 13.1 | 2.0              |
| 22 | 7              | 3.6                                                             | 8.5  | 1.5              |

23 \*Total bacterial colonies as well as those of Km<sup>r</sup> sporeformers deposited on two agar plates  
 24 by hand dryer air on two occasions in men's and women's bathrooms on various floors in  
 25 basic science research buildings 1 and 2, and above the academic (A) building were  
 26 determined as described in Methods.

27 <sup>1</sup>For each floor, values shown are averages of numbers of Km<sup>r</sup> sporeformers on plates in 4  
 28 men's and women's bathrooms divided by the total numbers of colonies on 4 plates each  
 29 in men's and women's bathrooms times 100%.

30 <sup>2</sup>Not applicable. Bathrooms on these floors above the academic building did not have hand  
 31 dryers.

32 <sup>3</sup>Floor where the laboratory in building 1 that produces large amounts of Km<sup>r</sup> spores of *B.*  
 33 *subtilis* strain PS533 is located.

34

35 Supplementary figure

36 Fig. S.1. Photograph of how bathroom air moved by a small fan was sampled for bacteria.

37 The distance between the fan blades and the LB agar surface of the plate is 3.5 in.

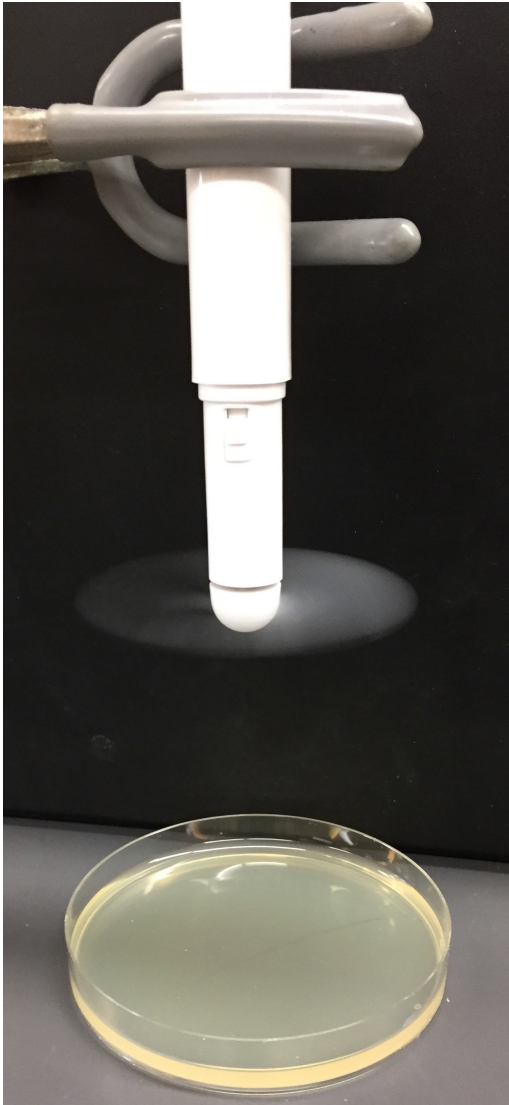

38

39

40

41
